# Supplementary material for: Terminal heterocyst differentiation in the Anabaena patA mutant as a result of post-transcriptional modifications and molecular leakage
Source: PubMed Central journal article supplement (PMC9410556; doi:10.1371/journal.pcbi.1010359), 2022-08-15
Supplement: pcbi.1010359.s001.pdf [file pcbi.1010359.s001.pdf]

| Parameter        | Description                                                                              | Value                  | Units                |
|------------------|------------------------------------------------------------------------------------------|------------------------|----------------------|
| $\beta_R$        | Basal production rate of HetR monomers                                                   | 66.665                 | $nM \cdot h^{-1}$    |
| $\rho_R$         | Maximum regulated production rates of HetR monomers                                      | 763.33                 | $nM \cdot h^{-1}$    |
| $\alpha_R$       | Linear degradation rate (including dilution) of HetR monomers                            | 2.1293                 | $h^{-1}$             |
| $\mu$            | Nonlinear degradation rate of HetR dimers                                                | $1.6354 \cdot 10^{-3}$ | $nM^{-1}$            |
| $\rho_A$         | Maximum regulated production rates of PatA                                               | 3862.3                 | $nM \cdot h^{-1}$    |
| $\alpha_A$       | Linear degradation rate (including dilution) of PatA                                     | 3.823                  | $h^{-1}$             |
| $\tau_A$         | Equilibrium constant of the PatA enhancement of the activation proces of HetR dimers     | 81.132                 | $nM$                 |
| $F_R$            | Fraction of HetF activated HetR dimers                                                   | $1.2578 \cdot 10^{-4}$ | DL                   |
| $\rho_S$         | Maximum regulated production rates of PatS                                               | 337.5                  | $nM \cdot h^{-1}$    |
| $\alpha_S$       | Linear degradation rate (including dilution) of PatS                                     | 2.0827                 | $h^{-1}$             |
| $c_S$            | Rate of conversion of PatS to the ERGSGR hexapeptide through cellular transport          | 8.1485                 | $h^{-1}$             |
| $\rho_N$         | Maximum regulated production rates of HetN                                               | 527.2                  | $nM \cdot h^{-1}$    |
| $\alpha_N$       | Linear degradation rate (including dilution) of HetN                                     | 2.6204                 | $h^{-1}$             |
| $c_N$            | Rate of conversion of hetN to the ERGSGR hexapeptide through cellular transport          | 5.7671                 | $h^{-1}$             |
| $\alpha_I$       | Linear degradation rate (including dilution) of ERGSGR hexapeptide                       | 2.3684                 | $h^{-1}$             |
| $d_I$            | Diffusion rate of the ERGSGR hexapeptide                                                 | 9.0777                 | $h^{-1}$             |
| $\rho_G$         | Maximum regulated fixation rates of nitrogen                                             | 7533.7                 | $nM \cdot h^{-1}$    |
| $\alpha_G$       | Linear degradation rate (including dilution) of fixed nitrogen                           | 4.32                   | $h^{-1}$             |
| $d_G$            | Diffusion rate of the fixed nitrogen                                                     | 100.04                 | $h^{-1}$             |
| $K_G$            | Equilibrium constant for the inhibitory reaction between HetR and the fixed nitrogen     | 162.03                 | $nM$                 |
| $d_{border}$     | Rate of diffusion through the border cells                                               | 0.381                  | DL                   |
| $\Omega_\Lambda$ | Noise strength in cellular growth and size                                               | 0.081                  | DL                   |
| $\Omega_\Phi$    | Noise strength in gene expression and initial concentration                              | 0.21                   | DL                   |
| $K_d$            | Equilibrium constant for the inhibitory reaction between HetR and the ERGSGR hexapeptide | 7.36 (ref.[15])        | $nM$                 |
| $\lambda$        | Cellular growth rate                                                                     | 0.08                   | $\mu m \cdot h^{-1}$ |
| $M_\Lambda$      | Average maximum cell size                                                                | 4                      | $\mu m$              |
| $T_R$            | Average minimum HetR concentration threshold to diferenciate                             | 110                    | $nM$                 |
| $M_R$            | Average accumulated HetR concentration required to form an heterocyst                    | 1320                   | $nM$                 |
| $T_{min}$        | Minimum time to differentiate                                                            | 5                      | h                    |
